# Supplementary material
Source: HighWire-hosted journal article supplement (https://bmjopen.bmj.com/content/11/9/e048141)
Supplement: inline-supplementary-material-2 [file inline-supplementary-material-2.pdf]

## Appendix 2

### Assumed tables structure for data synthesis

**Appendix Table 1. Characteristics of included studies**

| Study Reference | Publication year | Country | Population | Comparators | Type of biomarker | Health-economic outcomes | Threshold (WTP) | Conclusions |
|-----------------|------------------|---------|------------|-------------|-------------------|--------------------------|-----------------|-------------|
|                 |                  |         |            |             |                   |                          |                 |             |
|                 |                  |         |            |             |                   |                          |                 |             |

**Appendix Table 2. Methodology of the included studies**

| Study Reference | Study design | Type of Economic evaluation | Perspective used in the analysis | Type of costs included | Reference year of costs | Effectiveness measures |
|-----------------|--------------|-----------------------------|----------------------------------|------------------------|-------------------------|------------------------|
|                 |              |                             |                                  |                        |                         |                        |
|                 |              |                             |                                  |                        |                         |                        |
